# Supplementary material
Source: PubMed Central journal article supplement (PMC4836373)
Supplement: supp_fj.201500153_Supplemental_Figure1.pdf [file supp_fj.201500153_Supplemental_Figure1.pdf]

**Figure S1**

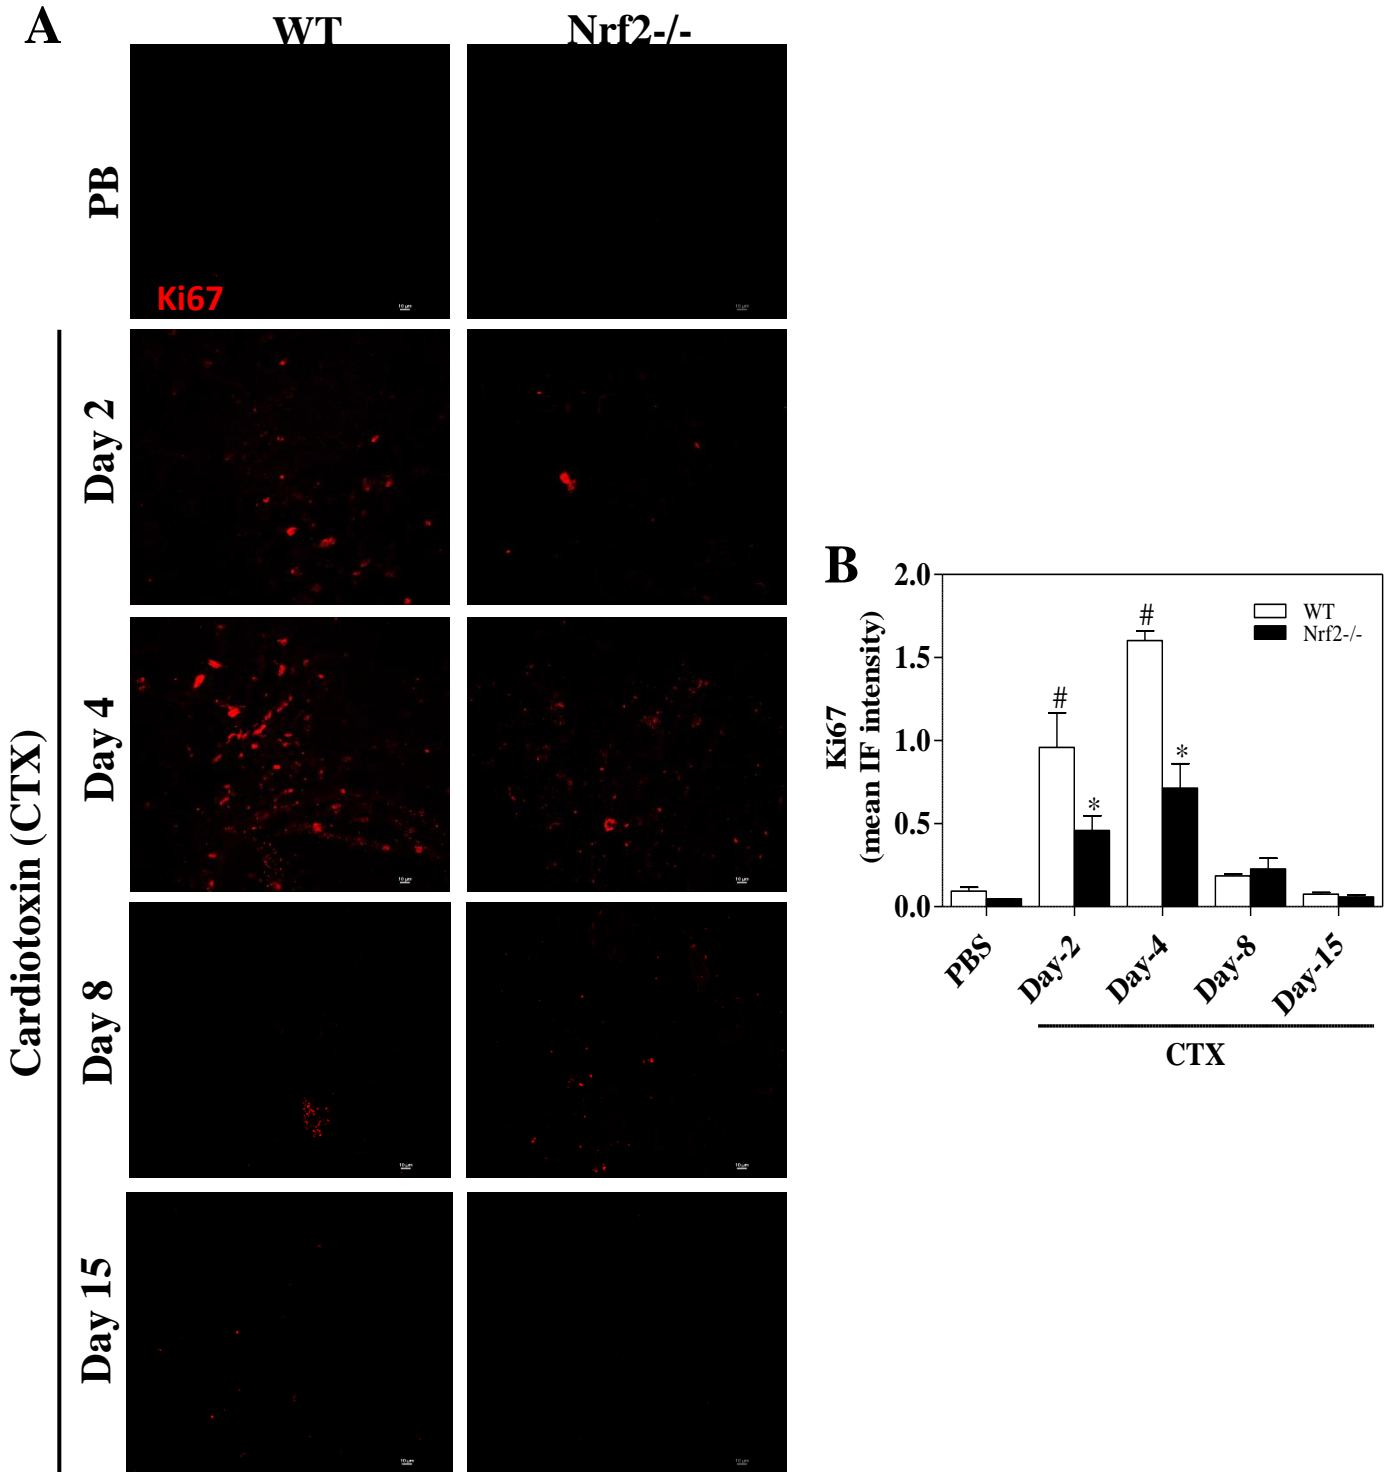

**Figure S1: Immunostaining of Ki67 in TA muscles of WT and Nrf2<sup>-/-</sup> mice.** (A) Immunofluorescence images of Ki67 (red fluorescence) expression in TA muscle treated with PBS and CTX and collected on day 2, day 4, day 8 and day 15 of post-injury. The bar graphs represent the mean fluorescence intensity of Ki67 (B). Statistical significance was calculated by one way ANOVA, where # (PBS vs. CTX-WT) and \* (CTX-WT vs Nrf2<sup>-/-</sup>) indicate  $p < 0.05$  between mean fluorescence intensity of Pax7 and Ki67 expression in TA muscles of WT and Nrf2<sup>-/-</sup> mice ( $n=3/\text{day}/\text{group}$ ).
